# Supplementary material for: A photoelectrochemical aptasensor for mucin 1 based on DNA/aptamer linking of quantum dots and TiO2 nanotube arrays
Source: Royal Society of Chemistry journal article supplement (doi:10.1039/c5ay02290h), 2016-01-01
Supplement: c5ay02290h1.pdf [file c5ay02290h1.pdf]

## Supporting Information

### **Photoelectrochemical aptasensor for mucin 1 based on DNA/aptamer linking of quantum dots and TiO<sub>2</sub> nanotube arrays**

Jiuying Tian, Tao Huang and Jusheng Lu\*

*Jiangsu Key Laboratory of Green Synthetic Chemistry for Functional Materials,  
School of Chemistry and Chemical Engineering, Jiangsu Normal University, Xuzhou  
221116, People's Republic of China*

\*Corresponding author at: School of Chemistry and Chemical Engineering, Jiangsu Normal University, 101 Shanghai Road, Xuzhou 221116, People's Republic of China.

E-mail: [lujusheng@sina.com](mailto:lujusheng@sina.com); Tel.: +86-516-83403165.

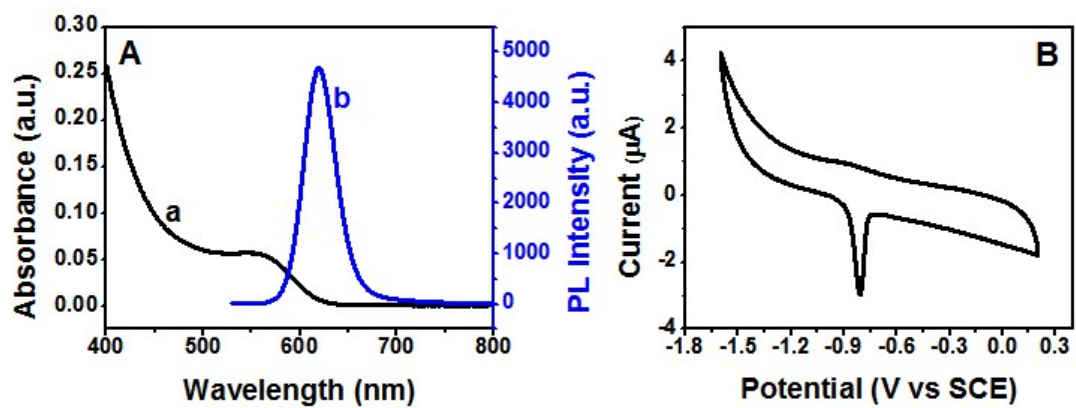

**Fig. S1** (A) UV-vis spectra (a) and PL spectra (b) of CdTe QDs; (B) Cyclic voltammogram of

CdTe QDs in 10 mM anaerobic PBS solution (pH 7.4), scan rate,  $0.1 \text{ V s}^{-1}$ .

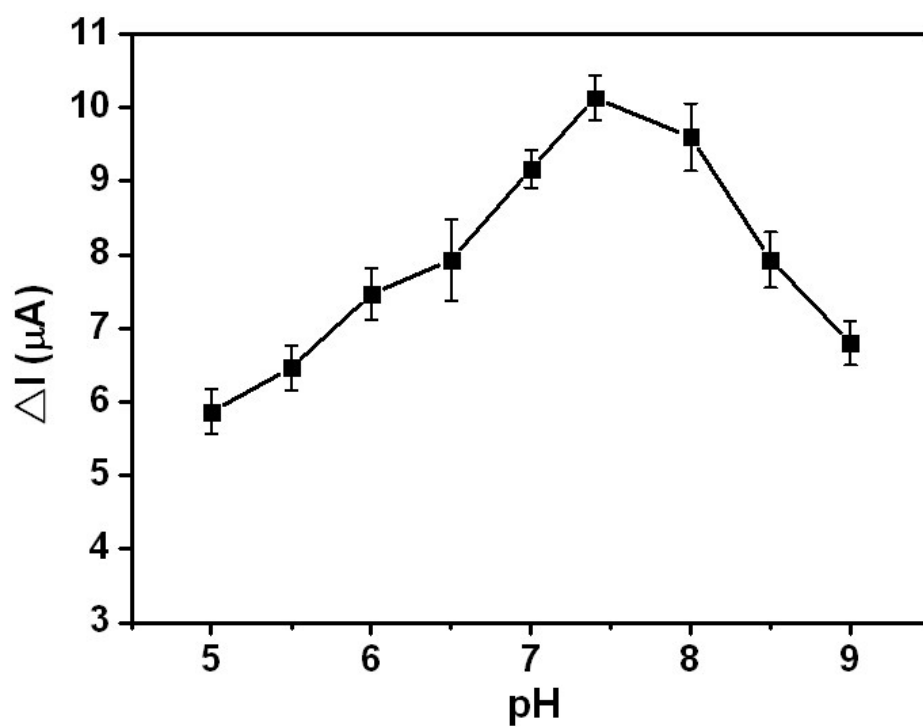

**Fig. S2** Influence of pH value on the photocurrent response change ( $\Delta I=I_0-I$ ) of the aptasensor when the aptasensor was immersed in the 10 mM PBS solution containing 100 nM MUC1.

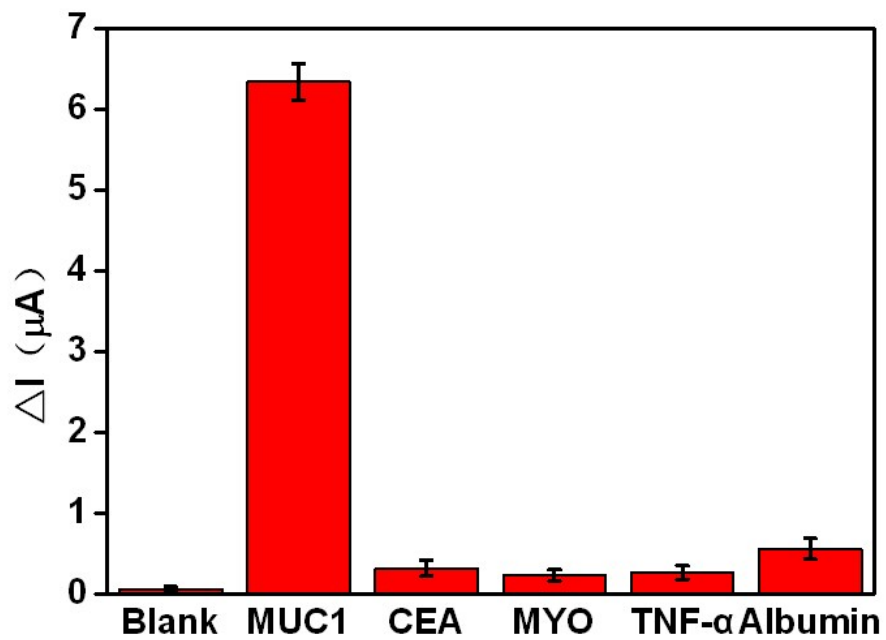

**Fig. S3** The changes of the photocurrent response ( $\Delta I$ ) of the  $\text{TiO}_2$  NT/aptamer/c-DNA@QD aptasensor after incubation with 10 nM of MUC1, 1  $\mu\text{M}$  of CEA, 1  $\mu\text{M}$  of MYO 1  $\mu\text{M}$  of TNF- $\alpha$ , or 1 mM of albumin for 2 h.

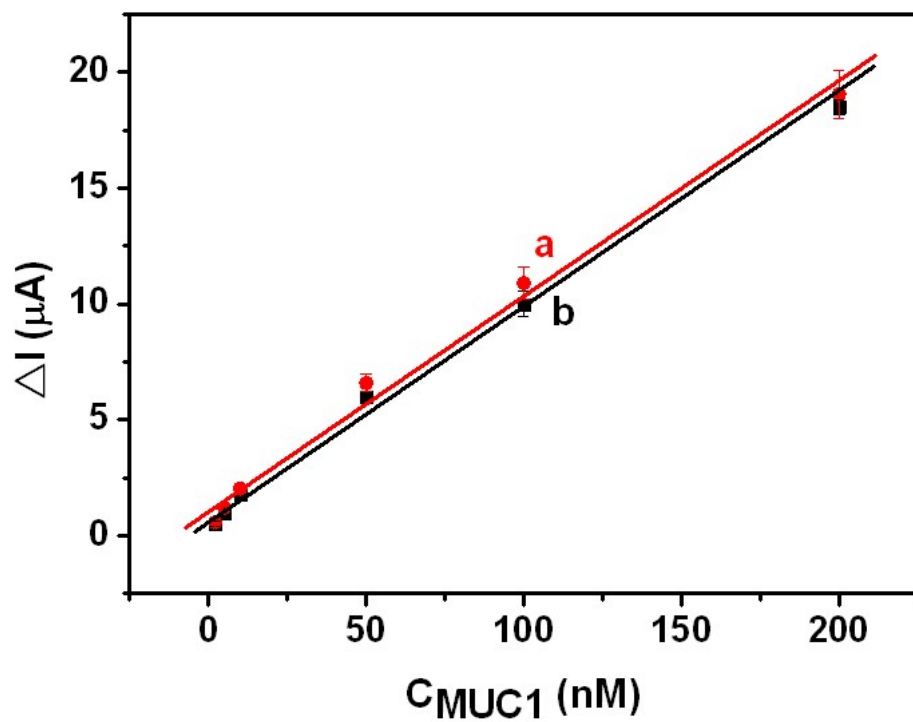

**Fig. S4** Calibration curve of photocurrent response change of the aptasensor ( $\Delta I$ ) versus MUC1 concentration when the aptasensor was in the serum solution (a) or PBS solution (b).

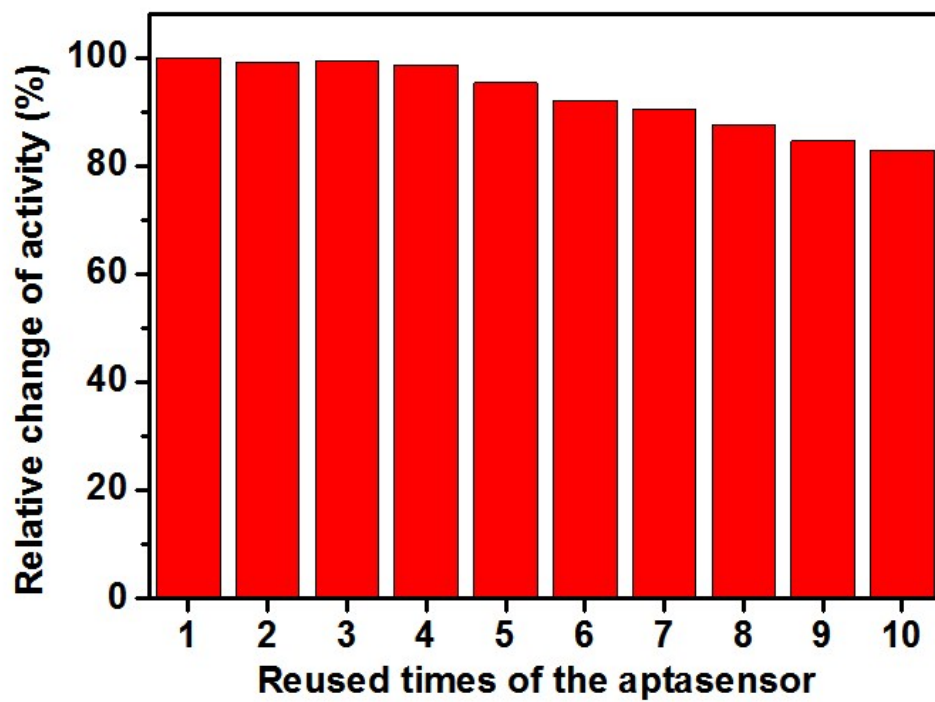

**Fig. S5** Relative change of activity when the developed aptasensor was repeat used after regeneration.

**Table S1** Determination of MUC1 added in healthy human serum with the proposed aptasensor

(mean  $\pm$  SD, n=6)

| Sample <sup>a</sup> | Concentration of MUC1 detected (nM) <sup>b</sup> | Concentration of MUC1 added (nM) | Concentration obtained with aptasensor (nM) | Recovery (%) |
|---------------------|--------------------------------------------------|----------------------------------|---------------------------------------------|--------------|
| Serum 1             | Not detected                                     | 10                               | 9.85 $\pm$ 0.42                             | 98.5         |
| Serum 2             | Not detected                                     | 50                               | 51.4                                        | 102.8        |
| Serum 3             | Not detected                                     | 100                              | 105.2 $\pm$ 3.9                             | 105.2        |

<sup>a</sup> Human serum samples were provided by Xuzhou Central Hospital, P.R. China.

<sup>b</sup> The measured value of the serum sample was diluted 20 times.
